# Supplementary material for: Smoke-Free Laws and Direct Democracy Initiatives on Smoking Bans in Germany: A Systematic Review and Quantitative Assessment
Source: Int J Environ Res Public Health. 2014 Jan 3;11(1):685–700. doi: 10.3390/ijerph110100685 (PMC3924468; doi:10.3390/ijerph110100685)
Supplement: Supplementary File 1 — Supplementary Information (PDF, 130 KB) [file ijerph-11-00685-s001.pdf]

# Smoke-Free Laws and Direct Democracy Initiatives on Smoking Bans in Germany: A Systematic Review and Quantitative Assessment

**Table S1.** German state smoke-free laws and amendments.

| <i>State/Law or Amendment</i> | <i>Date</i> | <i>Page</i> | <i>Name of Law or Amendment<br/>(in German)</i>                                                                       |
|-------------------------------|-------------|-------------|-----------------------------------------------------------------------------------------------------------------------|
| <i>Baden-Wuerttemberg</i>     |             |             |                                                                                                                       |
| Smoke-free law [1]            | 25.07.07    | 337         | Landesnichtraucherschutzgesetz                                                                                        |
| 1. Amendment act              | 03.03.09    | 81          | Gesetz zur Änderung des Landesnichtraucherschutzgesetzes                                                              |
| <i>Bavaria</i>                |             |             |                                                                                                                       |
| Smoke-free law [2]            | 20.12.07    | 919         | Gesetz zum Schutz der Gesundheit                                                                                      |
| 1. Amendment act              | 22.07.08    | 465         | Gesetz zur Änderung des Gesundheitsschutzgesetzes                                                                     |
| 2. Amendment act [3]          | 27.07.09    | 384         | Gesetz zur Änderung des Gesundheitsschutzgesetzes                                                                     |
| 3. Smoke-free law [4]         | 23.07.10    | 314         | Gesetz zum Schutz der Gesundheit                                                                                      |
| <i>Berlin</i>                 |             |             |                                                                                                                       |
| Smoke-free law [5]            | 16.11.07    | 578         | Gesetz zum Schutz vor den Gefahren des Passivrauchens in der Öffentlichkeit                                           |
| 1. Amendment act              | 16.11.07    | 578         | § 8 Abs. 3 Nichtraucherschutzgesetz                                                                                   |
| 2. Amendment act [6]          | 14.05.09    | 250         | Erstes Gesetz zur Änderung des Nichtraucherschutzgesetzes                                                             |
| 3. Amendment act              | 03.06.10    | 285         | § 34 Abs. 1 Wohnteilhabegesetz                                                                                        |
| <i>Brandenburg</i>            |             |             |                                                                                                                       |
| Smoke-free law [7]            | 18.12.07    | 346         | Gesetz zum Schutz vor den Gefahren des Passivrauchens in der Öffentlichkeit                                           |
| 1. Amendment act              | 27.05.09    | 156         | Erstes Gesetz zur Änderung des Brandenburgischen<br>Nichtrauchendenschutzgesetzes                                     |
| 2. Amendment act              | 15.07.10    | 1           | Art. 2 Abs. 3 Gesetz zur Errichtung und Auflösung von Landesoberbehörden<br>sowie zur Änderung von Rechtsvorschriften |
| <i>Bremen</i>                 |             |             |                                                                                                                       |
| Smoke-free law [8]            | 18.12.07    | 515         | Bremisches Nichtraucherschutzgesetz                                                                                   |
| 1. Amendment act              | 16.12.08    | 413         | Gesetz zur Änderung des Bremischen Nichtraucherschutzgesetzes                                                         |
| 2. Amendment act              | 24.01.12    | 24          | Nr. 2.1 i.V.m. Anl. 1 (no. 2.1 in conjunction with annex 1) Bekanntmachung<br>über die Änderung von Zuständigkeiten   |
| 3. Amendment act              | 11.27.12    | 505,<br>545 | Zweites Gesetz zur Änderung des Bremischen Nichtraucherschutzgesetzes                                                 |
| 4. Amendment act              | 06.25.13    | 297         | Gesetz zur Änderung des Bremischen Nichtraucherschutzgesetzes                                                         |

Table S1. Cont.

| State/Law or Amendment               | Date     | Page | Name of Law or Amendment<br>(in German)                                                                                       |
|--------------------------------------|----------|------|-------------------------------------------------------------------------------------------------------------------------------|
| <i>Hamburg</i>                       |          |      |                                                                                                                               |
| Smoke-free law [9]                   | 11.07.07 | 211  | Hamburgisches Gesetz zum Schutz vor den Gefahren des Passivrauchens in der Öffentlichkeit                                     |
| 1. Amendment act                     | 15.12.09 | 494  | Art. 4 Gesetz zur Umsetzung der Föderalismusreform im Heimrecht                                                               |
| 2. Amendment act                     | 15.12.09 | 506  | Gesetz zur Änderung des Hamburgischen Passivraucherschutzgesetzes                                                             |
| 3. Amendment act                     | 19.06.12 | 264  | Zweites Gesetz zur Änderung des Hamburgischen Gesetzes zum Schutz vor den Gefahren des Passivrauchens in der Öffentlichkeit   |
| <i>Hesse</i>                         |          |      |                                                                                                                               |
| Smoke-free law [10]                  | 06.09.07 | 568  | Gesetz zum Schutz vor den Gefahren des Passivrauchens                                                                         |
| 1. Amendment act                     | 14.12.09 | 666  | Art. 4 Abs. 7 Hessisches Hochschulgesetz und Gesetz zur Änderung des TUD-Gesetzessowie weiterer Rechtsvorschriften            |
| 2. Amendment act                     | 04.03.10 | 86   | Gesetz zur Änderung des Hessischen Nichtraucherschutzgesetzes                                                                 |
| 3. Amendment act                     | 27.09.12 | 290  | Art. 11 Siebtes Gesetz zur Verlängerung der Geltungsdauer und Änderung befristeter Rechtsvorschriften                         |
| <i>Mecklenburg-Western Pomerania</i> |          |      |                                                                                                                               |
| Smoke-free law [11]                  | 12.07.07 | 239  | Nichtraucherschutzgesetz Mecklenburg-Vorpommern                                                                               |
| 1. Amendment act                     | 17.12.09 | 738  | Erstes Gesetz zur Änderung des Nichtraucherschutzgesetzes Mecklenburg-Vorpommern                                              |
| <i>Lower Saxony</i>                  |          |      |                                                                                                                               |
| Smoke-free law [12]                  | 12.07.07 | 337  | Niedersächsisches Nichtraucherschutzgesetz                                                                                    |
| 1. Amendment act                     | 10.12.08 | 380  | Gesetz zur Änderung des Niedersächsischen Nichtraucherschutzgesetzes                                                          |
| <i>North. Rhine-Westphalia</i>       |          |      |                                                                                                                               |
| Smoke-free law [13]                  | 20.12.07 | 742  | Gesetz zum Schutz von Nichtraucherinnen und Nichtrauchern in Nordrhein-Westfalen                                              |
| 1. Amendment act                     | 30.06.09 | 390  | Gesetz zur Änderung des Gesetzes zum Schutz von Nichtraucherinnen und Nichtrauchern in Nordrhein-Westfalen                    |
| 2. Amendment act                     | 04.12.12 | 635  | Gesetz zur Änderung des Nichtraucherschutzgesetzes NRW                                                                        |
| <i>Rhineland-Palatinate</i>          |          |      |                                                                                                                               |
| Smoke-free law [14]                  | 05.10.07 | 534  | Nichtraucherschutzgesetz Rheinland-Pfalz                                                                                      |
| 1. Amendment act                     | 26.05.09 | 205  | Landesgesetz zur Änderung des Nichtraucherschutzgesetzes Rheinland-Pfalz                                                      |
| <i>Saarland</i>                      |          |      |                                                                                                                               |
| Smoke-free law [15]                  | 21.11.07 | 75   | Gesetz zum Schutz vor den Gefahren des Passivrauchens                                                                         |
| 1. Court decision                    | 01.12.08 | 131  | Entscheidung des Verfassungsgerichtshofs des Saarlandes (VerfGH Saarland, Lv 2/08, Lv 3/08, Lv 6/08), published in 2009       |
| 2. Amendment act                     | 14.01.09 | 396  | Gesetz zur Änderung des Nichtraucherschutzgesetzes und des Ersten Gesetzes zur Ausführung des Kinder- und Jugendhilfegesetzes |

Table S1. Cont.

| State/Law or Amendment    | Date     | Page | Name of Law or Amendment<br>(in German)                                                                                                                                                                                                                |
|---------------------------|----------|------|--------------------------------------------------------------------------------------------------------------------------------------------------------------------------------------------------------------------------------------------------------|
| 3. Amendment act          | 06.05.09 | 906  | § 22 Abs. 3 Saarländisches Gesetz zur Sicherung der Wohn-, Betreuungs- und Pflegequalität für ältere Menschen sowie pflegebedürftige und behinderte Volljährige                                                                                        |
| 4. Amendment act          | 10.02.10 | 25   | Gesetz zur Änderung des Nichtraucherschutzgesetzes                                                                                                                                                                                                     |
| 5. Court decision         | 21.06.10 | 1236 | Entscheidung des Verfassungsgerichtshofs des Saarlandes<br>(VerfGH Saarland, Lv 3/10, Lv 4/10, Lv 6/10)                                                                                                                                                |
| <i>Saxony</i>             |          |      |                                                                                                                                                                                                                                                        |
| Smoke-free law [16]       | 26.10.07 | 495  | Gesetz zum Schutz von Nichtrauchern im Freistaat Sachsen                                                                                                                                                                                               |
| 1. Amendment act          | 26.06.09 | 318  | Art. 3 Gesetz zur Neufassung des Gesetzes über Spielbanken im Freistaat Sachsen und zur Änderung des Sächsischen Ausführungsgesetzes zum Glücksspielstaatsvertrag                                                                                      |
| 2. Amendment act          | 10.12.09 | 682  | Gesetz zur Änderung des Sächsischen Nichtraucherschutzgesetzes                                                                                                                                                                                         |
| 3. Amendment act          | 03.07.11 | 198  | Art. 2 Sächsisches Gesetz zur Neuordnung des Gaststättenrechts                                                                                                                                                                                         |
| 4. Amendment act          | 14.06.12 | 270  | Art. 6 Gesetz zum Ersten Glücksspieländerungsstaatsvertrag, zum Staatsvertrag über die Gründung der GKL Gemeinsame Klassenlotterie der Länder und zur Änderung des Sächsischen Ausführungsgesetzes zum Glücksspielstaatsvertrag sowie weiterer Gesetze |
| <i>Saxony-Anhalt</i>      |          |      |                                                                                                                                                                                                                                                        |
| Smoke-free law [17]       | 19.12.07 | 464  | Gesetz zur Wahrung des Nichtraucherschutzes im Land Sachsen-Anhalt                                                                                                                                                                                     |
| 1. Court decision         | 22.10.08 | 396  | Entscheidung des Landesverfassungsgerichts Sachsen-Anhalt<br>(LVerfG Sachsen-Anhalt, LVG 3/08, LVG 4/08, LVG 7/08, LVG 8/08)                                                                                                                           |
| 2. Amendment act          | 14.07.09 | 373  | Gesetz zur Änderung des Nichtraucherschutzgesetzes                                                                                                                                                                                                     |
| 3. Amendment act          | 17.02.11 | 136  | § 37 Abs. 3 Gesetz über Wohnformen und Teilhabe des Landes Sachsen-Anhalt                                                                                                                                                                              |
| 4. Amendment act          | 23.01.13 | 38   | Art. 4 Gesetz zur Änderung des Kinderförderungsgesetzes und anderer Gesetze                                                                                                                                                                            |
| <i>Schleswig-Holstein</i> |          |      |                                                                                                                                                                                                                                                        |
| Smoke-free law [18]       | 10.12.07 | 485  | Gesetz zum Schutz vor den Gefahren des Passivrauchens                                                                                                                                                                                                  |
| 1. Amendment act          | 25.04.09 | 222  | Gesetz zur Änderung des Gesetzes zum Schutz vor den Gefahren des Passivrauchens                                                                                                                                                                        |
| <i>Thuringia</i>          |          |      |                                                                                                                                                                                                                                                        |
| Smoke-free law [19]       | 20.12.07 | 257  | Thüringer Gesetz zum Schutz vor den Gefahren des Passivrauchens                                                                                                                                                                                        |
| 1. Amendment act          | 26.06.10 | 250  | Erstes Gesetz zur Änderung des Thüringer Nichtraucherschutzgesetzes                                                                                                                                                                                    |
| 2. Amendment act          | 02.07.12 | 245  | Zweites Gesetz zur Änderung des Thüringer Nichtraucherschutzgesetzes                                                                                                                                                                                   |

Notes: Dates are denoted in the format date month year. Officially announced changes of the state smoke-free laws were considered at least until 28 June 2013 and at most until 27 November 2013. Page denotes the starting page of the law in the *Law and Ordinance Gazette* of the state. § denotes a paragraph, Art. denotes a section, Abs. denotes a subsection of the law. Source: Own compilation based on Beck-Online [20].

## References

1. Landesnichtraucherschutzgesetz (State non-smokers protection act). *Gesetzesblatt für Baden-Württemberg* **2007**, 337–339.
2. Gesetz zum Schutz der Gesundheit (Gesundheitsschutzgesetz) (Law to protect health (Health protection act)). *Bayerisches Gesetz- und Verordnungsblatt* **2010**, 314–316.
3. Gesetz zur Änderung des Gesundheitsschutzgesetzes (Law to change the health protection act). *Bayerisches Gesetz- und Verordnungsblatt* **2009**, 384.
4. Gesetz zum Schutz der Gesundheit (Gesundheitsschutzgesetz) (Law to protect health (Health protection act)). *Bayerisches Gesetz- und Verordnungsblatt* **2007**, 919–921.
5. Gesetz zum Schutz vor den Gefahren des Passivrauchens in der Öffentlichkeit (Nichtraucherschutzgesetz) (Law to protect against the dangers of passive smoking in public (Non-smokers protection act)). *Gesetz- und Verordnungsblatt für Berlin* **2007**, 578–579.
6. Erstes Gesetz zur Änderung des Nichtraucherschutzgesetzes (First act to amend the non-smokers protection law). *Gesetz- und Verordnungsblatt für Berlin* **2009**, 13, 250.
7. Gesetz zum Schutz vor den Gefahren des Passivrauchens in der Öffentlichkeit (Brandenburgisches Nichtrauchendenschutzgesetz) (Law to protect against the dangers of passive smoking in public (Brandenburg non-smokers protection act)). *Gesetz- und Verordnungsblatt für das Land Brand.* **2007**, I, 346–347.
8. Bremisches Nichtraucherschutzgesetz (Bremen non-smokers protection act). *Gesetzblatt der Freien Hansestadt Bremen* **2007**, 515–517.
9. Hamburgisches Gesetz zum Schutz vor den Gefahren des Passivrauchens in der Öffentlichkeit (Hamburgisches Passivraucherschutzgesetz) (Hamburgian law to protect against the dangers of passive smoking in public (Hamburgian passive- smokers protection act)). *Hamburgisches Gesetz- und Verordnungsblatt* **2007**, I, 211–212.
10. Gesetz zum Schutz vor den Gefahren des Passivrauchens (Hessisches Nichtraucherschutzgesetz) (Law to protect against the dangers of passive smoking (Hessian non-smokers protection act)). *Gesetz- und Verordnungsblatt für das Land Hessen* **2007**, I, 568.
11. Nichtraucherschutzgesetz Mecklenburg-Vorpommern (Non-smokers protection act Mecklenburg-western Pomerania). *Gesetz- und Verordnungsblatt für Mecklenburg-Vorpommern* **2007**, 239–240.
12. Niedersächsisches Gesetz zum Schutz vor den Gefahren des Passivrauchens (Niedersächsisches Nichtraucherschutzgesetz) (Lower Saxony law to protect against the dangers of passive smoking (Lower Saxony non-smokers protection act)). *Niedersächsisches Gesetz- und Verordnungsblatt* **2007**, 337–338.
13. Gesetz zur Verbesserung des Nichtraucherschutzes in Nordrhein-Westfalen (Law to improve non-smokers protection in north Rhine-Westphalia). *Gesetz- und Verordnungsblatt für das Land Nordrhein-Westfalen* **2007**, 742–743.
14. Nichtraucherschutzgesetz Rheinland-Pfalz (Non-smokers protection act Rhineland-Palatinate). *Gesetz- und Verordnungsblatt für das Land Rheinland-Pfalz* **2007**, 534–536.

15. Gesetz zum Schutz vor den Gefahren des Passivrauchens (Nichtraucherschutzgesetz) (Law to protect against the dangers of passive smoking (Non-smokers protection act)). *Amtsblatt des Saarlandes* **2008**, I, 75–78.
16. Gesetz zum Schutz von Nichtrauchern im Freistaat Sachsen (Sächsisches Nichtraucherschutzgesetz) (Law on the protection of non-smokers in the free state of Saxony (Saxon non-smokers protection act)). *Sächsisches Gesetz- und Verordnungsblatt* **2007**, 495–496.
17. Gesetz zur Wahrung des Nichtraucherschutzes im Land Sachsen-Anhalt (Nichtraucherschutzgesetz) (Law to preserve non-smokers protection in the state of Saxony-Anhalt (Non-smokers protection act)). *Gesetz- und Verordnungsblatt für das Land Sachsen-Anhalt* **2007**, 464–465.
18. Gesetz zum Schutz vor den Gefahren des Passivrauchens (Law to protect against the dangers of passive smoking). *Gesetz- und Verordnungsblatt für Schleswig-Holstein* **2007**, 485–486.
19. Thüringer Gesetz zum Schutz vor den Gefahren des Passivrauchens (Thuringian law to protect against the dangers of passive smoking). *Gesetz- und Verordnungsblatt für den Freistaat Thüringen* **2007**, 257–258.
20. Verlag, C.H. Beck-online—Die Datenbank (The Database). Available online: <http://beck-online.beck.de> (accessed on 2 December 2013).

© 2014 by the authors; licensee MDPI, Basel, Switzerland. This article is an open access article distributed under the terms and conditions of the Creative Commons Attribution license (<http://creativecommons.org/licenses/by/3.0/>).
